# Supplementary material
Source: ML conference proceedings conference paper supplement (https://proceedings.mlr.press/v129/zhao20a.html)
Supplement: Supplementary file [file zhao20a-supp.pdf]

## Dual Learning: Theoretical Study and an Algorithmic Extension (Supplementary Document)

### Appendix A. Derivation

We leverage the negative logarithmic probability to measure the differences between the original  $x^{(2)}$  and the reconstructed one. Let  $\mathcal{R}(x^{(2)})$  denote the event that after passing the loop  $S_2 \rightarrow S_k \rightarrow S_1 \rightarrow S_2$ ,  $x^{(2)}$  is reconstructed to  $x^{(2)}$ . We have that

$$\begin{aligned}
 \ln \Pr(\mathcal{R}(x^{(2)})) &= \sum_{x^{(k)} \in S_k} \sum_{x^{(1)} \in S_1} \ln \Pr(x^{(2)}, x^{(1)}, x^{(k)} | \\
 &\quad \text{starting from } x^{(2)}, \text{ applied by } \theta_{2k}, \theta_{k1}, \theta_{12} \text{ sequentially}) \\
 &= \sum_{x^{(k)} \in S_k} \sum_{x^{(1)} \in S_1} \ln \left( \Pr(x^{(1)}, x^{(k)} | x^{(2)}; \theta_{2k}, \theta_{k1}) \cdot \Pr(x^{(2)} | x^{(1)}; \theta_{12}) \right) \tag{1} \\
 &\geq \sum_{x^{(k)} \in S_k} \sum_{x^{(1)} \in S_1} \Pr(x^{(1)}, x^{(k)} | x^{(2)}; \theta_{2k}, \theta_{k1}) \cdot \ln \Pr(x^{(2)} | x^{(1)}; \theta_{12}) \\
 &= \sum_{x^{(k)} \in S_k} \sum_{x^{(1)} \in S_1} \Pr(x^{(k)} | x^{(2)}; \theta_{2k}, \theta_{k1}) \Pr(x^{(1)} | x^{(k)}, x^{(2)}; \theta_{2k}, \theta_{k1}) \cdot \ln \Pr(x^{(2)} | x^{(1)}; \theta_{12}) \\
 &= \sum_{x^{(k)} \in S_k} \sum_{x^{(1)} \in S_1} \Pr(x^{(k)} | x^{(2)}; \theta_{2k}) \Pr(x^{(1)} | x^{(k)}; \theta_{k1}) \cdot \ln \Pr(x^{(2)} | x^{(1)}; \theta_{12}) \tag{2} \\
 &= \mathbb{E}_{x^{(k)} \sim \Pr(\cdot | x^{(2)}; \theta_{2k})} \mathbb{E}_{x^{(1)} \sim \Pr(\cdot | x^{(k)}; \theta_{k1})} \ln \Pr(x^{(2)} | x^{(1)}; \theta_{12}). \tag{3}
 \end{aligned}$$

In Eqn.(1), the first Pr represents the jointly probability that  $x^{(2)}$  can be translated into  $x^{(k)}$  with  $\theta_{2k}$ , and the the obtained  $x^{(k)}$  can be translated into  $x^{(1)}$  with  $\theta_{k1}$ ; the second Pr represents the probability that given  $x^{(1)}$ , it can be translated back to  $x^{(2)}$  with  $\theta_{12}$ .
